# Supplementary material for: The Molecular Characterization of a New Prunus-Infecting Cheravirus and Complete Genome Sequence of Stocky Prune Virus
Source: MDPI journal article supplement (doi:10.3390/v14112325), 2022-10-23
Supplement: s1 [file s1]

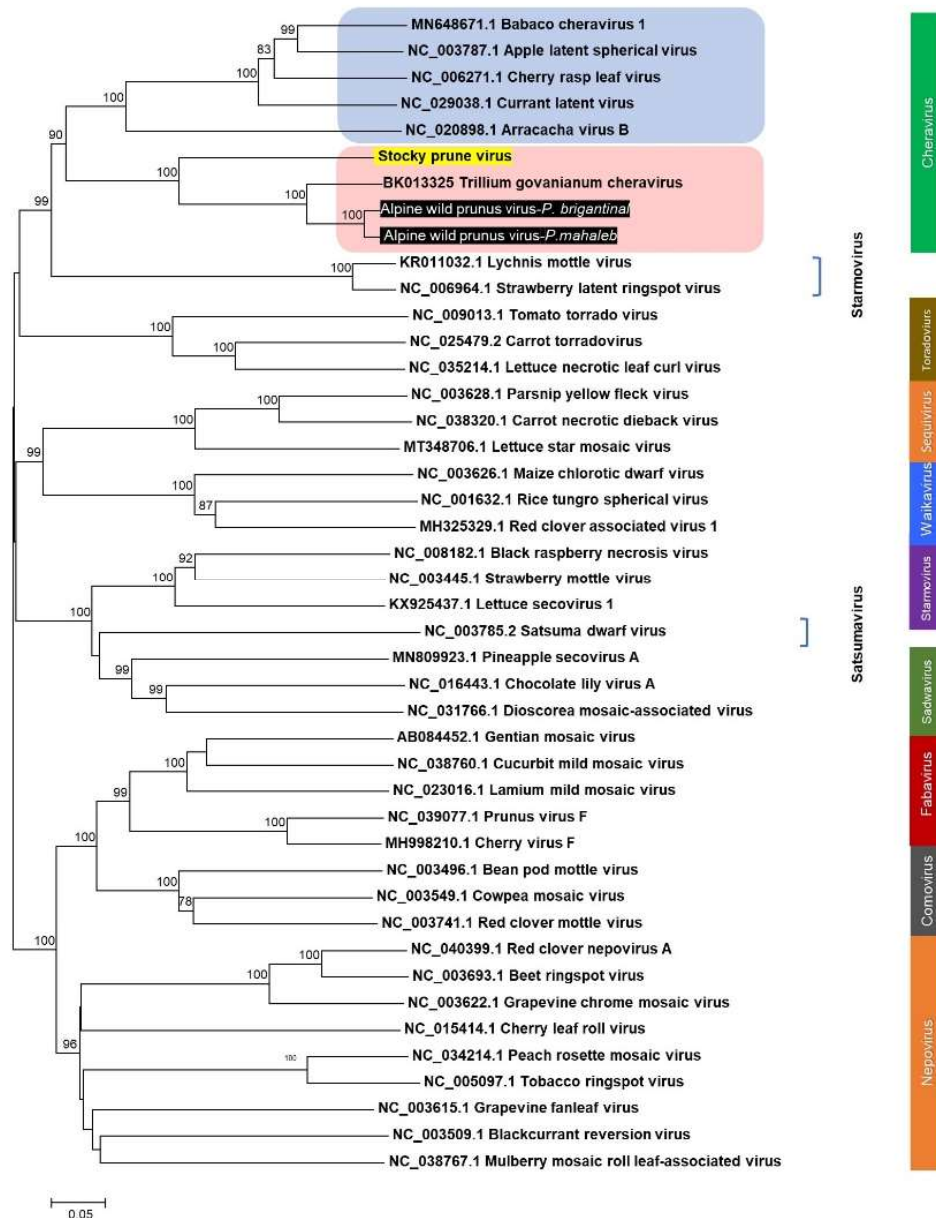

**Figure S1.** Phylogenetic tree reconstructed using the alignment of amino acid sequences of the Pro-Pol region (conserved domain between the “CG” motif of the 3C-protease and the “GDD” motif of the RdRp) as defined [28] of representative members of the family *Secoviridae*. The tree was generated using the neighbor joining method and strict aa identity p-distances. The statistical significance of branches was evaluated by bootstrap analysis (1,000 replicates). Bootstrap values less than 70% were removed. The scale bar represents 5% amino acid divergence. Accession numbers and names of the viruses included in the tree are indicated. Genera to which viruses belong are indicated at the right of the figure.

**Table S1.** List of primers used in this study, their purpose and their target molecule

| Primer              | Purpose     | Target <sup>1</sup> | Sequence 5'-3'                                          | combination     |
|---------------------|-------------|---------------------|---------------------------------------------------------|-----------------|
| Pb-seco-GAP1F1      | Gap filling | RNA1 AWPV-Pb        | TCAGTAAGCGTGGACGTATA                                    | Pb-seco-GAP1R1  |
| Pb-seco-GAP1R1      | Gap filling | RNA1 AWPV-Pb        | CAATGGAAGTTGCGCAGCC                                     |                 |
| Nseco-R1-5RACE-R1   | 5' RACE     | 5'end RNA1 AWPV-Pb  | GGAAGCCAGATGCCTCCGGTGGGA                                | Pb-seco-5F      |
| Pb-seco-5F          | 5' RACE     | 5'end RNA1 AWPV-Pb  | GGGCAGAGCCTTCAGATACT                                    |                 |
| Seco-PB-3RACE-R1    | 3' RACE     | 3'end RNA1 AWPV-Pb  | GCTGGATAGCCTGTGGCAAGTTCCTC                              | LD-prim         |
| Nseco-R2-5RACE-4    | 5' RACE     | 5'end RNA2 AWPV-Pb  | ACTGGTGCAATGAGAGCAGAAGAGAGA                             | UPM             |
| Seco-PB-3RACE-R2-2  | 3' RACE     | 3'end RNA2 AWPV-Pb  | CGGAACAATACAATCTCTTCAAG                                 | LD-prim         |
| Nseco-Pm-5RACE-R1   | 5' RACE     | 5'end RNA1 AWPV-Pm  | CTGCTCAGAGAGTGCCTCAATGGGCG                              | Pb-seco-5F      |
| Nseco-Pm-3RACE-R1   | 3' RACE     | 3'end RNA1 AWPV-Pm  | AGACTGGAGCTTACCATACTGAACC                               | LD-prim         |
| Nseco-Pm-5RACE-R2-2 | 5' RACE     | 5'end RNA2 AWPV-Pm  | AAGGCCCACATCTGCCAGGGACAAGGT                             | Pb-seco-5F      |
| Nseco-Pm-3RACE-R2   | 3' RACE     | 3'end RNA2 AWPV-Pm  | CCTTGAGAGGTAGCGCAGCTATTGCAC                             | LD-prim         |
| StPV-5RACE-RNA1     | 5' RACE     | 5'end RNA1          | GGCAGCACTTCCTCGGCTACGGGG                                | UPM             |
| StPV-3RACE-RNA1     | 3' RACE     | 3'end RNA1 StPV     | TGGGGATGGCCTTAGCCAGGCTGT                                | LD-prim         |
| StPV-5RACE-RNA2-2   | 5' RACE     | 5'end RNA2 StPV     | CAGAGTACN <sub>3</sub> GGTTTCTTCTTGCGGTA                | StPV-5RACE-RNA2 |
| StPV-5RACE-RNA2     | 5' RACE     | 5'end RNA2 StPV     | GGGCGAGGTTCGGTGCAGAGCTGAA                               |                 |
| StPV-3RACE-RNA2     | 3' RACE     | 3'end RNA2 StPV     | CGGGTCGGCCACAGAACTTGGGGTAG                              | LD-prim         |
| LD-prim             | 3'end       | LD-PCR              | CACTGGCGGCCGCTCGAGCATGTAC                               |                 |
| LD-poly T           | 3'end       | cDNA synthesis      | CACTGGCGGCCGCTCGAGCATGTACT <sub>25</sub> N <sub>3</sub> |                 |
| New-seco-CP-F       | Detection   | RNA2, AWPV-Pb, Pm   | TTGATGGTCCCAGTATTGTTCC                                  | New-seco-CP-R   |
| New-seco-CP-R       | Detection   |                     | TCCCATTTCCGTGCTTAAGAAT                                  |                 |
| Seco-PA-R1-F        | Detection   | RNA1-AWPV-Pa        | CTTTCTTGC GTACCTTGGCC                                   | Seco-PA-R1-R    |
| Seco-PA-R1-R        | Detection   |                     | GAAGCTGCAGATTTCCCACA                                    |                 |
| StPV RNA1 F1        | Detection   | RNA1-StPV           | CTCTTGCAAATAAGGTTTCGCA                                  | StPV RNA1 R1    |
| StPV RNA1 R1        | Detection   |                     | GGGAGCTAAA ACTCTACCAG                                   |                 |

<sup>1</sup> AWPV-Pb: Alpine wild prunus virus-*P. brigantina*; AWPV-Pm: Alpine wild prunus virus-*P. mahaleb*; AWPV-Pa: Alpine wild prunus virus-*P. armeniaca*; StPV: stocky prune virus
